# Supplementary material
Source: publisher site journal article supplement (https://static.cambridge.org/content/id/urn:cambridge.org:id:article:S1355617720000648/resource/name/S1355617720000648supp001.docx)
Supplement: Supplementary file 1 [file S1355617720000648supp001.docx]

Supplementary Table 1. Characteristics of participants with and without follow-up data

|  |  | With Follow-Up (N=492) | Without Follow-Up (N=85) | Difference *p* |
| --- | --- | --- | --- | --- |
| Age (years) | | 74.0 (5.8) | 77.7 (7.4) | <.001 |
| Female (%) | | 63.3 | 64.7 | .802 |
| Race/ethnicity | |  |  | .709 |
|  | % Black | 41.2 | 44.7 |  |
|  | % Hispanic | 27.4 | 28.2 |  |
|  | % White | 31.4 | 27.1 |  |
| Education (years) | | 13.4 (4.4) | 12.2 (4.5) | .022 |
| Chronic diseases (0-15) | | 2.0 (1.4) | 2.5 (1.6) | .005 |
| Depressive symptoms (0-10) | | 1.3 (1.7) | 1.4 (1.7) | .417 |
| Cognition | |  |  |  |
|  | Episodic memory (composite) | 0.6 (0.7) | 0.2 (0.8) | <.001 |
|  | Language (composite) | 0.8 (0.6) | 0.4 (0.7) | <.001 |
|  | Visuospatial (composite) | 0.7 (0.5) | 0.5 (0.6) | <.001 |
|  | Executive/Speed (composite) | 0.1 (0.8) | -0.3 (1.0) | <.001 |
|  | Working Memory (0-26) | 13.5 (3.7) | 11.8 (4.3) | <.001 |
| Positive Psychosocial Factors | |  |  |  |
|  | Life Satisfaction (theta) | 0.3 (1.0) | 0.2 (0.9) | .176 |
|  | Meaning & Purpose (theta) | 0.2 (1.0) | 0.0 (0.9) | .069 |
|  | Positive Affect (theta) | -0.2 (0.9) | -0.3 (0.9) | .315 |
|  | Emotional Support (theta) | -0.2 (1.0) | -0.5 (1.1) | .025 |
|  | Instrumental Support (theta) | -0.2 (1.1) | -0.3 (1.1) | .429 |
|  | Friendship (theta) | 0.0 (1.1) | -0.2 (1.2) | .033 |
|  | Self-Efficacy (theta) | 0.0 (1.0) | -0.2 (1.1) | .062 |

*Note.* Group differences were determined with independent samples t-tests for continuous variables and chi square tests for categorical variables.

Supplementary Table 2. Details of the NIH Toolbox Emotion Module surveys

| Survey | Stem | Response Categories |
| --- | --- | --- |
| Life Satisfaction | Indicate how much you agree or disagree | 5-point Likert-type scale from “*Strongly Disagree*” to “*Strongly Agree*” |
| Meaning & Purpose | Indicate how much you agree or disagree | 5-point Likert-type scale from “*Strongly Disagree*” to “*Strongly Agree*” |
| Positive Affect | In the past 7 days: | 5-point Likert-type scale from “*Not at all*” to “*Very Much*” |
| Emotional Support | In the past month, please describe how often… | 5-point Likert-type scale from “*Never*” to “*Always*” |
| Instrumental Support | In the past month, please describe how often… | 5-point Likert-type scale from “*Never*” to “*Always*” |
| Friendship | In the past month, please describe how often… | 5-point Likert-type scale from “*Never*” to “*Always*” |
| Self-Efficacy | Please read the sentence and decide how true it is of you in general | 5-point Likert-type scale from “*Never*” to “*Very Often*” |

Supplementary Table 3. Bivariate correlations between positive psychosocial factors, covariates, and cognition

|  | Female | Education | Non-Hispanic Black | Hispanic | Depressive Symptoms | Chronic Diseases | Life Satisfaction | Meaning & Purpose | Positive Affect | Emotional Support | Instrumental Support | Friendship | Self-Efficacy | Language | Episodic Memory | Visuospatial Functioning | Executive/ Speed | Working Memory |
| --- | --- | --- | --- | --- | --- | --- | --- | --- | --- | --- | --- | --- | --- | --- | --- | --- | --- | --- |
| Age | .006 | -.253** | -.026 | .121** | .032 | .227** | -.003 | -.021 | -.082* | -.063 | .073 | -.060 | -.096* | -.277** | -.315** | -.256** | -.365** | -.374** |
| Female |  | -.047 | .087* | .024 | .042 | .114** | .021 | .071 | .071 | .099* | -.045 | .172** | -.003 | -.033 | .116** | -.011 | -.109** | .022 |
| Education |  |  | .059 | -.521** | -.053 | -.226** | -.014 | -.107** | .061 | -.116** | -.172** | -.072 | .131** | .597** | .386** | .552** | .552** | .480** |
| Non-Hispanic Black |  |  |  | -.521** | -.032 | .129** | -.219** | -.006 | .077 | -.151** | -.113** | -.012 | -.049 | -.100* | -.087* | -.089* | -.038 | -.006 |
| Hispanic |  |  |  |  | .025 | .085* | .121** | .106* | -.069 | .191** | .213** | .125** | -.050 | -.444** | -.245** | -.338** | -.451** | -.427** |
| Depressive Symptoms |  |  |  |  |  | .157** | -.321** | -.232** | -.309** | -.245** | -.156** | -.246** | -.272** | -.091* | -.134** | -.096* | -.116** | -.065 |
| Chronic Diseases |  |  |  |  |  |  | -.058 | -.016 | -.052 | -.005 | .079 | .013 | -.046 | -.200** | -.198** | -.204** | -.189** | -.196** |
| Life Satisfaction |  |  |  |  |  |  |  | .515** | .540** | .471** | .368** | .395** | .355** | .020 | .074 | -.001 | -.004 | -.063 |
| Meaning & Purpose |  |  |  |  |  |  |  |  | .509** | .449** | .334** | .485** | .391** | -.085* | -.032 | -.110** | -.073 | -.131** |
| Positive Affect |  |  |  |  |  |  |  |  |  | .395** | .277** | .414** | .383** | .043 | .078 | .003 | .085* | -.006 |
| Emotional Support |  |  |  |  |  |  |  |  |  |  | .580** | .674** | .376** | -.098* | -.016 | -.110** | -.111** | -.097* |
| Instrumental Support |  |  |  |  |  |  |  |  |  |  |  | .491** | .277** | -.173** | -.120** | -.186** | -.166** | -.184** |
| Friendship |  |  |  |  |  |  |  |  |  |  |  |  | .343** | -.061 | .029 | -.138** | -.082* | -.072 |
| Self-Efficacy |  |  |  |  |  |  |  |  |  |  |  |  |  | .192** | .137** | .094* | .132** | .108* |
| Language |  |  |  |  |  |  |  |  |  |  |  |  |  |  | .613** | .647** | .672** | .613** |
| Episodic Memory |  |  |  |  |  |  |  |  |  |  |  |  |  |  |  | .489** | .488** | .465** |
| Visuospatial Functioning |  |  |  |  |  |  |  |  |  |  |  |  |  |  |  |  | .600** | .558** |
| Executive/ Speed |  |  |  |  |  |  |  |  |  |  |  |  |  |  |  |  |  | .610** |

**p*<.05. ***p*<.01. *Note.* Correlations between continuous variables are expressed as Pearson’s *r*, while correlations involving categorical variables are expressed as Spearman’s rho.

Supplementary Table 4. Items from the NIH Toolbox Friendship survey

| I get invited to go out and do things with other people. |
| --- |
| I have friends I get together with to relax. |
| There are people around with whom to have fun. |
| I can find a friend when I need one. |
| I feel like I have lots of friends. |
| I have friends who will have lunch with me when I want. |
| I feel close to my friends. |
| I feel like I'm part of a group of friends. |
